# Supplementary material for: Role of chromatin and transcriptional co-regulators in mediating p63-genome interactions in keratinocytes
Source: PubMed Central journal article supplement (PMC4302094; doi:10.1186/1471-2164-15-1042), 2014-11-29

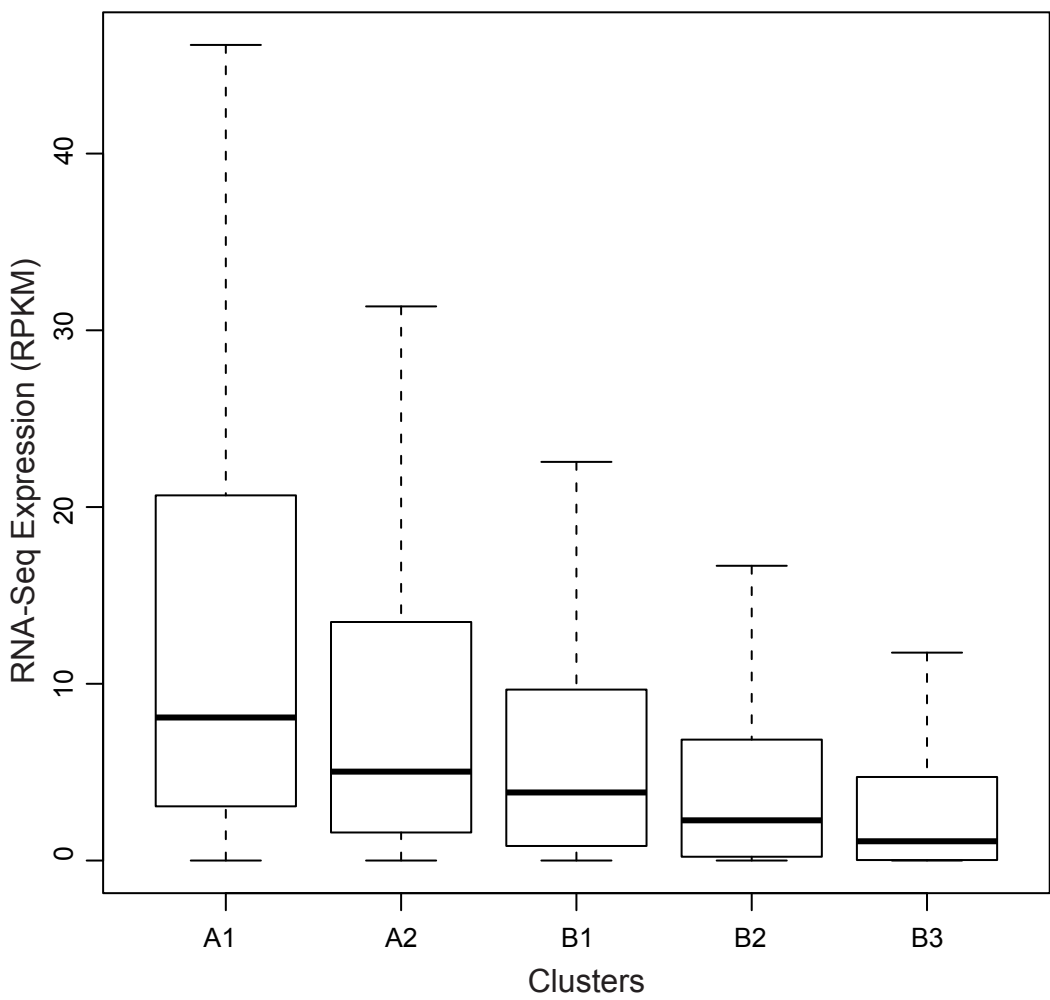

Supplement: 12864_2014_6850_MOESM4_ESM.pdf [file 12864_2014_6850_MOESM4_ESM.pdf]
