# Supplementary material for: Role of chromatin and transcriptional co-regulators in mediating p63-genome interactions in keratinocytes
Source: PubMed Central journal article supplement (PMC4302094; doi:10.1186/1471-2164-15-1042), 2014-11-29
Supplement: 12864_2014_6850_MOESM5_ESM.pdf [file 12864_2014_6850_MOESM5_ESM.pdf]

Table S2: Discriminant Models

| Model                                           | Chromatin Marks |          |                                   |       |         |         |        |       |         |         |       |           |             | Accuracy    |  |
|-------------------------------------------------|-----------------|----------|-----------------------------------|-------|---------|---------|--------|-------|---------|---------|-------|-----------|-------------|-------------|--|
|                                                 | H3K4me1         | H3K27me3 | DF (DNase-FAIRE interaction term) | FAIRE | H3K4me2 | H3K4me3 | H3K9ac | DNase | H3K27ac | H3K9me3 | Motif | Intercept | Sensitivity | Specificity |  |
| <b>Best 3</b>                                   | 30.96           | -5.99    | 13.95                             |       |         |         |        |       |         |         |       | -25.09    | 89.08%      | 97.65%      |  |
| <b>Best 3 + motif</b>                           | 31.69           | -4.32    | 14.31                             |       |         |         |        |       |         | -0.04   |       | -24.59    | 88.82%      | 97.64%      |  |
| <b>Regression 3</b>                             | 29.49           |          | 11.08                             |       |         |         | 1.64   |       |         |         |       | -24.07    | 89.62%      | 97.54%      |  |
| <b>Regression 3 + motif</b>                     | 32.81           |          | -27.92                            |       |         |         | 27.81  |       |         | -0.17   |       | -30.38    | 89.74%      | 97.23%      |  |
| <b>All significant chromatin marks</b>          | 28.4            | -7.72    | 13.47                             |       | 9.39    | 1.63    | 20.39  | 5.84  | -8.76   |         |       | -25.78    | 91.18%      | 96.99%      |  |
| <b>All significant chromatin marks + motif</b>  | 29.77           | -5.95    | -28.61                            |       | 9.69    | 1.65    | 30.37  | -5.79 | -5.06   | -0.11   |       | -29.85    | 90.95%      | 96.90%      |  |
| <b>Full Discriminant Analysis model</b>         | 29.73           | -7.03    | -18.55                            | -8.73 | 9.79    | 2.17    | 25.2   | -5.56 | -6.69   | -1.04   |       | -25.65    | 90.84%      | 97.00%      |  |
| <b>Full Discriminant Analysis model + motif</b> | 29.89           | -5.91    | -28.76                            | -1.57 | 9.73    | 2.1     | 30.73  | -5.47 | -5.02   | -0.1    |       | -29.54    | 90.90%      | 96.93%      |  |
