# Supplementary material for: Role of chromatin and transcriptional co-regulators in mediating p63-genome interactions in keratinocytes
Source: PubMed Central journal article supplement (PMC4302094; doi:10.1186/1471-2164-15-1042), 2014-11-29
Supplement: 12864_2014_6850_MOESM6_ESM.pdf [file 12864_2014_6850_MOESM6_ESM.pdf]

Table S3: Regression Models

| Model                             | Chromatin Marks |         |         |        |       |         |         |         |       |                                   |        |           |                | Accuracy |          |         |  |
|-----------------------------------|-----------------|---------|---------|--------|-------|---------|---------|---------|-------|-----------------------------------|--------|-----------|----------------|----------|----------|---------|--|
|                                   | H3K27me3        | H3K9me3 | H3K4me3 | H3K9ac | FAIRE | H3K27ac | H3K4me2 | H3K4me1 | DNase | DF (DNase-FAIRE interaction term) | Motif  | Intercept | R <sup>2</sup> | MSE      | F value  | P-value |  |
| H3K27me3                          | 0.1827          |         |         |        |       |         |         |         |       |                                   |        | 0.3435    | 0.008          | 0.3709   | 453.73   | 3e-100  |  |
| H3K9me3                           |                 | 0.4837  |         |        |       |         |         |         |       |                                   |        | 0.2688    | 0.020          | 0.3653   | 1166.256 | <1e-200 |  |
| H3K4me3                           |                 |         | 1.0664  |        |       |         |         |         |       |                                   |        | 0.1467    | 0.290          | 0.2471   | 24664.98 | <1e-200 |  |
| H3K9ac                            |                 |         |         | 1.0674 |       |         |         |         |       |                                   |        | 0.139     | 0.344          | 0.2322   | 31055.23 | <1e-200 |  |
| FAIRE                             |                 |         |         |        | 2.609 |         |         |         |       |                                   |        | -0.277    | 0.427          | 0.1858   | 48288.28 | <1e-200 |  |
| H3K27ac                           |                 |         |         |        |       | 0.9162  |         |         |       |                                   |        | 0.1764    | 0.485          | 0.1872   | 54354.22 | <1e-200 |  |
| H3K4me2                           |                 |         |         |        |       |         | 1.1938  |         |       |                                   |        | 0.0932    | 0.572          | 0.1432   | 83889.03 | <1e-200 |  |
| H3K4me1                           |                 |         |         |        |       |         |         | 1.2704  |       |                                   |        | 0.071     | 0.655          | 0.1104   | 124600.5 | <1e-200 |  |
| DNase                             |                 |         |         |        |       |         |         |         | 1.593 |                                   |        | -0.059    | 0.665          | 0.1144   | 122062.2 | <1e-200 |  |
| DF (DNase-FAIRE interaction term) |                 |         |         |        |       |         |         |         |       | 2.7255                            |        | 0.1016    | 0.672          | 0.1163   | 121399.8 | <1e-200 |  |
| Motif                             |                 |         |         |        |       |         |         |         |       |                                   | 0.0151 | 0.4871    | 0.140          | 0.3096   | 9531.949 | <1e-200 |  |
| Best 3                            |                 |         |         |        |       |         |         | 0.6939  | 0.628 | 0.4981                            |        | -0.014    | 0.748          | 0.0828   | 63204.5  | <1e-200 |  |
| Best 3 + motif                    |                 |         |         |        |       |         |         | 0.682   | 0.416 | 0.8247                            | 0.0016 | 0.0241    | 0.749          | 0.0826   | 47599.55 | <1e-200 |  |
| Full regression model             | -0.0302         | 0.0237  | -0.0707 | -0.041 | 0.128 | -0.089  | 0.213   | 0.5927  | 0.565 | 0.6438                            |        | -0.024    | 0.750          | 0.0817   | 19251.93 | <1e-200 |  |
| Full Regression model + motif     | -0.0484         | -0.0087 | -0.0667 | -0.04  | -0.02 | -0.094  | 0.2153  | 0.5965  | 0.449 | 0.8691                            | 0.0022 | 0.0495    | 0.744          | 0.0815   | 17432.86 | <1e-200 |  |
